# Supplementary material for: Current Consumption of Traditional Cowpea-Based Dishes in South Benin Contributes to at Least 30% of the Recommended Intake of Dietary Fibre, Folate, and Magnesium
Source: MDPI journal article supplement (doi:10.3390/nu15061314), 2023-03-07
Supplement: s1 [file s1]

# Supplementary Materials

**Table S1.** Description of the nine traditional cowpea-based dishes.

|              | Cowpea-based dishes | Principal ingredients §                                 | Description                                                                                      |
|--------------|---------------------|---------------------------------------------------------|--------------------------------------------------------------------------------------------------|
| Stews        | Abobo               | Cowpea                                                  | Boiled cowpea seeds that are almost pureed after cooking and still contain free water.           |
|              | Vèyi                | Cowpea                                                  | Boiled cowpea seeds with no free water left after cooking                                        |
|              | Adowè               | Dehulled cowpea                                         | Dehulled cowpea seeds cooked in water.                                                           |
| Doughnuts    | Ata                 | Dehulled cowpea                                         | Fried cowpea dough made with dehulled seeds                                                      |
|              | Ata-doco            | Cowpea                                                  | Fried cowpea dough made with whole seeds                                                         |
|              | Ataclè              | Cowpea                                                  | Whole cowpea dough fried twice and stored in oil after frying                                    |
| Mixed dishes | Atassi              | Cowpea: Rice (1:5 to 2:7)<br>Cowpea/Rice (w/ w)         | Rice and cowpea cooked in water                                                                  |
|              | Abla                | Maize: Cowpea: Palm Nut Extract or Red Palm Oil (3:3:4) | Paste made from steamed dehulled cowpea with red palm oil/palm nut extract and some cowpea seeds |
|              | Djongoli            | Cowpea:Maize:Oil (3:3:1)                                | Cowpea seeds and maize flour; sometimes cooked with red oil or palm nuts extract.                |

§: Information collected from (Madode et al. 2011).

**Table S2.** Reference mean values used to calculate the contribution of cowpea-based dishes to the recommended nutrient intakes (RNIs).

|                |                      | <b>Women</b> | <b>Men</b> | <b>All <sup>†</sup></b> |
|----------------|----------------------|--------------|------------|-------------------------|
| Energy         | Energy (kcal)        | 2200         | 2800       | 2500                    |
| Macronutrients | Protein (g)          | 54           | 54         | 54                      |
|                | Fibre (g)            | 30           | 30         | 30                      |
| Minerals       | Ca (mg)              | 1000         | 1000       | 1000                    |
|                | Mg (mg)              | 220          | 260        | 240                     |
|                | K (mg)               | 3510         | 3510       | 3510                    |
|                | Zn <sup>1</sup> (mg) | 9.8          | 14         | 11.9                    |
|                | Fe <sup>2</sup> (mg) | 58.8         | 27.4       | 43.1                    |
|                | Folate (µg)          | 400          | 400        | 400                     |
| Vitamins       | Thiamine (mg)        | 1.1          | 1.2        | 1.15                    |

† Mean values of RNIs for women and men. These values were used to calculate the contribution to RNIs. <sup>1</sup> RNIs for zinc, based on a bioavailability of 15%. <sup>2</sup> RNIs for iron, based on a bioavailability of 5%. References values were from: FAO-WHO, (2004) for energy; FAO and WHO, (2007) for proteins; ANSES, (2016) for fibre; FAO and WHO, (2004) for vitamins and minerals.

**Table S3.** Food atlas and FFQ validation using Spearman's correlations and the Bland-Altman method.

| Cowpea-based dishes |          | Food Atlas validation        |                        |         |                                 |             | FFQ validation                               |                        |         |                                 |             |
|---------------------|----------|------------------------------|------------------------|---------|---------------------------------|-------------|----------------------------------------------|------------------------|---------|---------------------------------|-------------|
|                     |          | Weight record vs 24-h recall |                        |         |                                 |             | FFQ vs Mean values of the three 24-h recalls |                        |         |                                 |             |
|                     |          | n                            | Spearman's correlation |         | Bland and Altman test (ratio %) |             | n                                            | Spearman's correlation |         | Bland and Altman test (ratio %) |             |
|                     |          |                              | R                      | p-value | Mean                            | [LLOA;ULOA] |                                              | R                      | p-value | Mean                            | [LLOA;ULOA] |
| Stews               | Abobo    | 51                           | 0.5                    | <0.001  | 108                             | [45;258]    | 99                                           | 0.42                   | <0.001  | 96                              | [32;282]    |
|                     | Vêyi     | 31                           | 0.64                   | <0.001  | 162                             | [65;400]    | 23                                           | 0.74                   | 0.05    | 95                              | [39;233]    |
|                     | Adowè    | 51                           | 0.21                   | >0.05   | 75                              | [29;195]    | 18                                           | 0.62                   | >0.05   | 66                              | [23;191]    |
| Dough nuts          | Ata      | 51                           | 0.85                   | <0.001  | 84                              | [52;138]    | 35                                           | 0.85                   | <0.001  | 95                              | [59;152]    |
|                     | Ata-doco | 34                           | 0.71                   | <0.001  | 74                              | [41;134]    | 25                                           | 0.74                   | <0.05   | 82                              | [40;165]    |
|                     | Ataclè   | 34                           | 0.83                   | <0.001  | 128                             | [92;178]    | 7                                            | na                     |         | na                              |             |
| Mixed dishes        | Atassi   | 52                           | 0.38                   | <0.05   | 99                              | [47;208]    | 112                                          | 0.37                   | <0.001  | 94                              | [39;228]    |
|                     | Abla     | 19                           | 0.64                   | <0.05   | 77                              | [45;131]    | 5                                            | na                     |         | na                              |             |
|                     | Djongoli | 51                           | 0.41                   | <0.05   | 94                              | [39;228]    | 37                                           | 0.64                   | <0.05   | 86                              | [32;234]    |

[LLOA; ULOA]: Lower and upper limits of agreement at 95% confidence interval. na: Sample size was too small to perform the analysis.

**Table S4.** Influence of socio-economic and demographic factors on the daily quantities of cowpea-based dishes consumed during the week before the FFQ survey.

| Area  | Factors     |                       | Cowpea-based dishes (g, FW) |       |       |           |          |              |          |         | Cowpea seeds ‡<br>(g, FW) |          |
|-------|-------------|-----------------------|-----------------------------|-------|-------|-----------|----------|--------------|----------|---------|---------------------------|----------|
|       |             |                       | Stews                       |       |       | Doughnuts |          | Mixed dishes |          |         |                           |          |
|       |             |                       | Abobo                       | Vèyi  | Adowè | Ata       | Ata-doco | Ataclè       | Atassi   | Abla    | Djongoli                  |          |
| Rural | Sample size |                       | 496                         | 77    | 35    | 122       | 188      | 35           | 440      | 85      | 213                       |          |
|       | Commune     | Adjohoun (reference)  |                             |       |       |           |          |              |          |         |                           |          |
|       |             | Allada                | -28.1**                     | 4.4   | 6.1   | 12.8*     | 2.8      | 6.0          | -6.5     | 5.0     | -2.8                      | -10.3*   |
|       | Education   | None (reference)      |                             |       |       |           |          |              |          |         |                           |          |
|       |             | Primary school        | -9.1                        | 3.4   | 4.0   | 4.9       | 1.0      | 15.9         | -37.2    | 4.0     | 6.1                       | -8.7     |
|       |             | Secondary school      | -5.9                        | -7.1  | 19.7  | 12.2      | -3.2     | 24.2         | -8.8     | -14.7   | 32.7                      | -3.7     |
|       |             | University            | 24.6                        |       | -     | 21.4      | -10.3    | -7.4         | -27.1    | -3.3    | 102.5*                    | -1.7     |
|       | Age         | <27 years (reference) |                             |       |       |           |          |              |          |         |                           |          |
|       |             | 27–34 years           | 11.6                        | 33.0  | -13.6 | -11.9     | -2.3     |              | -35.5*   | -31.2   | 7.8                       | -1.2     |
|       |             | 35–44 years           | 9.4                         | 18.3  | -4.3  | -7.1      | -2.0     | -0.4         | -40.6**  | -0.4    | 8.0                       | 5.4      |
|       |             | 45–65 years           | 2.9                         | 15.0  | 9.6   | -2.8      | -9.0     | -23.6        | -70.8*** | -4.6    | 31.9                      | -2.7     |
|       | Sex         | Men (reference)       |                             |       |       |           |          |              |          |         |                           |          |
|       |             | Women                 | -13.0                       | -22.3 | 23.1* | -0.2      | -8.3     | 0.5          | -22.0*   | -17.6*  | -0.06                     | -9.2*    |
|       | SEI 2       | Low (reference)       |                             |       |       |           |          |              |          |         |                           |          |
|       |             | Middle                | 0.2                         | -2.2  | 0.02  | -9.7      | -6.6     | 7.3          | 12.2     | 0.4     | -6.3                      | -3.4     |
|       |             | High                  | -20.7*                      | -9.7  | -4.8  | -13.2     | -5.5     | 5.0          | -1.1     | -4.2    | -51.3***                  | -17.1**  |
| Urban | Sample size |                       | 441                         | 142   | 150   | 350       | 92       | 38           | 444      | 30      | 95                        |          |
|       | Education   | None (reference)      |                             |       |       |           |          |              |          |         |                           |          |
|       |             | Primary school        | 2.0                         | 18.8  | 17.6  | 24.2**    | -62.1**  | 22.0         | -3.2     | 185.7** | 14.2                      | 20.8*    |
|       |             | Secondary school      | -2.1                        | -11.5 | 1.2   | 5.8       | 14.1     | 5.7          | 2.6      | 21.0    | -1.2                      | -0.005   |
|       |             | University            | 5.4                         | -3.5  | -10.0 | 11.0      | -12.1    | -31.6        | 0.9      | -13.2   | -13.9                     | -12.5    |
|       | Age         | <27 years (reference) |                             |       |       |           |          |              |          |         |                           |          |
|       |             | 27–34 years           | 10.0                        | 5.3   | 2.5   | 1.4       | 33.5     | -32.2        | -10.3    | -15.5   | 2.0                       | 6.7      |
|       |             | 35–44 years           | 7.8                         | 10.4  | 3.2   | -14.8     | 31.2     | -53.2**      | -14.8    | 5.4     | 7.9                       | -0.25    |
|       |             | 45–65 years           | 3.7                         | 1.1   | 0.4   | -12.4     | 21.1     | -54.1*       | -17.0    | -49.9   | 8.8                       | -7.8     |
|       | Sex         | Men (reference)       |                             |       |       |           |          |              |          |         |                           |          |
|       |             | Women                 | -49.1***                    | 22.2* | -4.4  | -12.0*    | -11.2    | 35.9*        | -18.0*   | 25.9    | -4.3                      | -35.0*** |
|       | SEI 1       | Low (reference)       |                             |       |       |           |          |              |          |         |                           |          |
|       |             | Middle                | -1.0                        | 3.8   | 9.6   | 11.7      | 41.1*    | -28.3        | -21.2    | 56.1    | -12.8                     | 9.0      |
|       |             | High                  | -9.1                        | 2.2   | 15.6* | 17.3*     | 20.6     | 8.6          | -27.4*   | -0.2    | -30.5*                    | 21.9     |

‡Quantities of dishes were converted into quantities of cowpea seed equivalent. SEI 1: Socio-economic index in the urban area. SEI 2: Socio-economic index in the rural areas. Values are GLM coefficients and p-values are shown when significant (\*: 0.01 < p ≤ 0.05; \*\*: 0.001 < p ≤ 0.01; \*\*\*: p ≤ 0.001).

**Table S5.** Comparison of the nutritional composition of the nine cowpea-based dishes sampled at different street food vendors (100 g of edible portion).

| Group        | Dishes   | Producers      | Protein (g) | Lipid (g)  | Available carbohydrate (g) | Ash (g)   | Energy (Kcal) | Ca (mg)    | Fe (mg)    | Mg (mg)    | Zn (mg)   | K (mg)       | Folate (μg) | Thiamine (μg) |
|--------------|----------|----------------|-------------|------------|----------------------------|-----------|---------------|------------|------------|------------|-----------|--------------|-------------|---------------|
| Stews        | Abobo    | P1             | 7.1 ±0.1    | 0.5 ±0.0   | 17.2 ±0.0                  | 1.4 ±0.0  | 113 ± 0       | 34.5 ±2.2  | 1.6 ±0.0   | 48.6 ±1.7  | 1.1 ±0.1  | 333.5 ±14.8  | 53.7 ±0.2   | 43.1 ±1       |
|              |          | P2             | 6.0 ±0.1    | 0.5 ±0.0   | 14.3 ±0.0                  | 1.3 ±0.0  | 97 ± 0        | 23.2 ±2.4  | 1.0 ±0.1   | 32.7 ±4.2  | 0.8 ±0.1  | 245.7 ±31.6  | 61.1 ±4.4   | 58.8 ±2       |
|              |          | P3             | 5.7 ±0.1    | 0.6 ±0.0   | 11.3 ±0.1                  | 2.0 ±0.0  | 85 ± 0        | 33.2 ±1.8  | 1.6 ±0.0   | 36.9 ±2.8  | 0.7 ±0.0  | 236.6 ±22.3  | 53.0 ±2.1   | 28.7 ±0       |
|              |          | <i>P-value</i> | <0.001      | Ns         | <0.001                     | <0.001    |               | 0.02       | 0.004      | 0.03       | 0.04      | 0.05         | 0.02        | <0.001        |
|              | Vèyi     | P1             | 7.0 ±0.0    | 0.6 ±0.0   | 14.4 ±1.0                  | 1.6 ±0.0  | 105 ± 0       | 21.7 ±0.7  | 1.6 ±0.0   | 47.0 ±1.8  | 1.0 ±0.1  | 328.9 ±19.3  | 73.9 ±3.7   | 114.6 ±4      |
|              |          | P2             | 7.9 ±0.0    | 0.4 ±0.0   | 18.8 ±0.0                  | 2.2 ±8.7  | 125 ± 0       | 31.6 ±1.6  | 1.4 ±0.0   | 42.3 ±1.3  | 1.1 ±0.0  | 277.4 ±6.0   | 88.8 ±4.5   | 117.9 ±8      |
|              |          | P3             | 7.5 ±0.0    | 0.7 ±0.0   | 16.9 ±0.0                  | 1.8 ±0.0  | 119 ± 0       | 30.3 ±0.5  | 1.4 ±0.0   | 49.7 ±1.4  | 1.2 ±0.0  | 361.8 ±9.9   | 78.8 ±4.0   | 36.2 ±2       |
|              |          | <i>P-value</i> | <0.001      | <0.001     | <0.001                     | <0.001    |               | 0.004      | 0.01       | 0.04       | 0.02      | 0.02         | 0.01        | 0.001         |
|              | Adowè    | P1             | 7.4 ± 0.0   | 0.2 ± 0.0  | 16.2 ± 0.1                 | 1.5 ± 0.0 | 106 ± 0       | 25.5 ± 1.2 | 1.3 ± 0.1  | 39.5 ± 1.3 | 1.0 ± 0.0 | 253.7 ± 11.6 | 57.2 ± 2.2  | 47.9 ± 0      |
|              |          | P2             | 4.8 ± 0.2   | 0.5 ± 0.0  | 10.7 ± 0.2                 | 1.5 ± 0.0 | 76 ± 0        | 17.5 ± 1.1 | 0.9 ± 0.1  | 31.6 ± 1.9 | 0.7 ± 0.0 | 220.4 ± 15.0 | 45.8 ± 3.5  | 2.2 ± 0       |
|              |          | P3             | 6.7 ± 0.1   | 0.6 ± 0.0  | 14.1 ± 0.0                 | 1.3 ± 0.0 | 99 ± 0        | 34.1 ± 1.6 | 1.0 ± 0.1  | 39.3 ± 1.9 | 1.0 ± 0.0 | 299.2 ± 14.2 | 92.4 ± 12   | 35.1 ± 0      |
|              |          | <i>P-value</i> | <0.001      | <0.001     | <0.001                     | 0.01      |               | 0.002      | 0.04       | 0.03       | 0.01      | 0.02         | <0.001      | <0.001        |
| Dough nuts   | Ata      | P1             | 7.0 ± 0.0   | 16.3 ± 0.3 | 18.1 ± 0.3                 | 2.2 ± 0.0 | 257 ± 1       | 21.7 ± 0.8 | 4.6 ± 0.0  | 49.6 ± 1.4 | 1.1 ± 0.0 | 328.3 ± 9.8  | 80.9 ± 23   | 117.4 ± 28    |
|              |          | P2             | 8.0 ± 0.0   | 13.3 ± 0.3 | 20.7 ± 0.3                 | 2.1 ± 0.1 | 244 ± 2       | 25.0 ± 1.5 | 4.0 ± 0.1  | 49.8 ± 2.7 | 1.2 ± 0.1 | 352.6 ± 20.9 | 79.0 ± 7.2  | 146.9 ± 3     |
|              |          | P3             | 7.4 ± 0.1   | 29.0 ± 1.2 | 17.2 ± 1.1                 | 1.8 ± 0.0 | 368 ± 6       | 37.8 ± 0.2 | 4.0 ± 0.5  | 49.8 ± 0.2 | 1.2 ± 0.0 | 318.0 ± 3.8  | 50.8 ± 7.0  | 135.5 ± 2     |
|              |          | <i>P-value</i> | <0.001      | <0.001     | 0.03                       | 0.006     |               | 0.001      | Ns         | Ns         | Ns        | Ns           | <0.001      | Ns            |
|              | Ata doco | P1             | 7.6 ± 0.1   | 18.6 ± 0.4 | 21.1 ± 0.2                 | 1.7 ± 0.1 | 294 ± 2       | 28.0 ± 1.1 | 3.7 ± 0.2  | 56.2 ± 2.0 | 1.4 ± 0.1 | 369.7 ± 16.1 | 52.4 ± 2.7  | 132.3 ± 10    |
|              |          | P2             | 9.1 ± 0.1   | 23.3 ± 0.2 | 21.5 ± 0.1                 | 2.6 ± 0.0 | 345 ± 1       | 29.4 ± 0.8 | 3.0 ± 0.2  | 62.0 ± 2.4 | 1.6 ± 0.0 | 434.1 ± 16.1 | 86.3 ± 9.6  | 165.5 ± 3     |
|              |          | P3             | 9.7 ± 0.1   | 7.6 ± 0.8  | 23.2 ± 1.0                 | 2.4 ± 0.1 | 213 ± 4       | 38.8 ± 5.1 | 5.5 ± 1.0  | 63.7 ± 8.0 | 1.4 ± 0.2 | 472.1 ± 64.7 | 53.4 ± 5.3  | 109.5 ± 9     |
|              |          | <i>P-value</i> | <0.001      | <0.001     | Ns                         | 0.001     |               | Ns         | 0.05       | Ns         | Ns        | Ns           | 0.001       | 0.01          |
|              | Ataclè   | P1             | 10.1 ± 0.0  | 34.5 ± 0.1 | 24.7 ± 0.1                 | 2.0 ± 0.0 | 464 ± 0       | 24.4 ± 0.2 | 3.2 ± 0.1  | 67.9 ± 0.4 | 1.7 ± 0.0 | 509.2 ± 1.1  | 55.8 ± 3.0  | 148.5 ± 15    |
|              |          | P2             | 10.0 ± 0.0  | 28.6 ± 0.4 | 25.1 ± 0.2                 | 2.3 ± 0.1 | 411 ± 2       | 37.8 ± 1.6 | 15.9 ± 6.2 | 73.9 ± 2.7 | 1.7 ± 0.1 | 516.3 ± 21.6 | 100 ± 8.6   | 197.5 ± 3     |
|              |          | P3             | 9.6 ± 0.2   | 36.8 ± 0.5 | 21.8 ± 0.3                 | 2.4 ± 0.0 | 471 ± 3       | 38.1 ± 3.8 | 4.9 ± 0.4  | 63.4 ± 6.2 | 1.4 ± 0.2 | 473.4 ± 47.8 | 96.8 ± 5.2  | 178.8 ± 2     |
|              |          | <i>P-value</i> | 0.04        | <0.001     | 0.001                      | 0.02      |               | 0.02       | Ns         | Ns         | Ns        | Ns           | <0.001      | 0.02          |
| Mixed dishes | Atassi   | P1             | 2.9 ± 0.0   | 1.1 ± 0.1  | 24.7 ± 0.1                 | 1.1 ± 0.0 | 126 ± 1       | 7.0 ± 0.8  | 0.5 ± 0.0  | 18.4 ± 1.4 | 0.5 ± 0.0 | 123.2 ± 9.7  | 11.6 ± 1.6  | 35.1 ± 0      |
|              |          | P2             | 2.9 ± 0.0   | 0.2 ± 0.0  | 23.1 ± 0.0                 | 0.9 ± 0.0 | 111 ± 0       | 11.0 ± 0.6 | 0.2 ± 0.0  | 9.1 ± 0.5  | 0.3 ± 0.0 | 65.4 ± 4.1   | 9.1 ± 0.3   | 28.3 ± 0      |
|              |          | P3             | 3.1 ± 0.1   | 0.9 ± 0.0  | 23.3 ± 0.1                 | 1.1 ± 0.0 | 119 ± 0       | 6.5 ± 0.4  | 0.4 ± 0.0  | 12.8 ± 0.8 | 0.3 ± 0.1 | 82.6 ± 6.6   | 16.6 ± 0.9  | 39.4 ± 0      |
|              |          | <i>P-value</i> | 0.02        | <0.001     | <0.001                     | <0.001    |               | 0.01       | <0.001     | 0.01       | 0.02      | 0.01         | <0.001      | <0.001        |
|              | Abla     | P1             | 4.3 ±0.0    | 11.3 ±0.0  | 16.0 ±0.0                  | 1.5 ±0.0  | 193 ± 0       | 27.1 ±0.8  | 1.9 ±0.0   | 41.0 ±1.1  | 0.8 ±0.0  | 204.3 ±6.8   | 59.1 ±3.8   | 57.6 ±1       |
|              |          | P2             | 4.1 ±0.0    | 8.3 ±0.1   | 14.2 ±0.1                  | 1.4 ±0.0  | 158 ± 0       | 25.5 ±0.3  | 5.1 ±0.2   | 38.8 ±0.4  | 0.7 ±0.0  | 193.9 ±0.7   | 41.9 ±4.1   | 42.3 ±2       |
|              |          | P3             | 2.5 ±0.0    | 11.2 ±0.1  | 10.5 ±0.1                  | 0.9 ±0.0  | 163 ± 0       | 22.5 ±0.6  | 1.9 ±0.0   | 38.7 ±1.2  | 0.6 ±0.0  | 101.8 ±4.9   | 20.0 ±3.2   | 50.9 ±3       |
|              |          | <i>P-value</i> | <0.001      | <0.001     | <0.001                     | <0.001    |               | 0.01       | <0.001     | Ns         | 0.01      | <0.001       | <0.001      | 0.02          |
|              | Djongoli | P1             | 3.2 ± 0.1   | 7.8 ± 0.2  | 16.5 ± 0.3                 | 1.4 ± 0.0 | 160 ± 1       | 7.3 ± 0.5  | 1.3 ± 0.3  | 30.3 ± 0.9 | 0.7 ± 0.0 | 145.4 ± 3.4  | 14.9 ± 2.6  | 33.1 ± 1      |
|              |          | P2             | 5.8 ± 0.0   | 9.7 ± 0.2  | 21.8 ± 0.2                 | 1.1 ± 0.0 | 208 ± 1       | 12.1 ± 0.4 | 1.8 ± 0.1  | 45.0 ± 1.9 | 1.0 ± 0.0 | 256.6 ± 12.1 | 96.5 ± 21.1 | 50.4 ± 2      |
|              |          | P3             | 3.7 ± 0.0   | 4.0 ± 0.0  | 17.7 ± 0.0                 | 1.3 ± 0.0 | 132 ± 0       | 10.2 ± 0.2 | 1.6 ± 0.1  | 36.3 ± 0.7 | 0.7 ± 0.0 | 178.1 ± 4.5  | 32.5 ± 4.1  | 49.4 ± 3      |
|              |          | <i>P-value</i> | <0.001      | <0.001     | <0.001                     | <0.001    |               | 0.002      | Ns         | 0.003      | 0.007     | 0.001        | <0.001      | 0.005         |

Values are the mean ± standard deviation (SD) (n=2 or 3 in case of folate) and p-values are provided when significant (p <0.05).

**Table S6.** Nutritional densities of the nine cowpea-based dishes (per 100 kcal).

|                         | Dish     | Protein<br>(g) | Fat<br>(g) | Available<br>carbohydrate<br>(g) | Dietary<br>fibre<br>(g) | Ash<br>(g) | Ca<br>(mg) | Mg<br>(mg) | K<br>(mg) | Fe<br>(mg) | Zn<br>(mg) | Folate<br>(µg) | Thiamine<br>(µg) |
|-------------------------|----------|----------------|------------|----------------------------------|-------------------------|------------|------------|------------|-----------|------------|------------|----------------|------------------|
| <b>Stews</b>            | Abobo    | 6.4 ±0.3       | 0.5 ±0.1   | 14.4 ±0.8                        | 6.0 ±0.8                | 1.6 ±0.6   | 31.3 ±7.1  | 40.1 ±5.5  | 276 ±27   | 1.4 ±0.4   | 1.0 ±0.1   | 71.1 ±15       | 44.3 ±13         |
|                         | Vêyi     | 6.4 ±0.2       | 0.5 ±0.1   | 14.3 ±0.6                        | 6.2 ±0.5                | 1.6 ±0.1   | 23.8 ±2.5  | 40.1 ±5.2  | 280 ±46   | 1.3 ±0.2   | 1.0 ±0.1   | 69.1 ±4        | 77.8 ±37         |
|                         | Adowè    | 6.6 ±0.3       | 0.5 ±0.2   | 14.6 ±0.6                        | 5.4 ±0.3                | 1.6 ±0.3   | 27.2 ±5.8  | 39.5 ±2.4  | 277 ±32   | 1.1 ±0.1   | 1.0 ±0.1   | 69.2 ±20       | 27.9 ±20         |
| <b>Doughnuts</b>        | Ata      | 2.7 ±0.6       | 6.6 ±1.1   | 6.7 ±1.7                         | 1.7 ±0.3                | 0.7 ±0.2   | 9.7 ±1.0   | 17.8 ±3.4  | 120 ±27   | 1.5 ±0.3   | 0.4 ±0.1   | 25.9 ±10       | 47.6 ±12         |
|                         | Ata-doco | 3.3 ±1.0       | 5.6 ±1.6   | 8.1 ±2.2                         | 2.3 ±0.5                | 0.8 ±0.2   | 12.1 ±4.9  | 22.3 ±6.2  | 158 ±52   | 1.6 ±0.8   | 0.5 ±0.1   | 22.6 ±4        | 48.1 ±4          |
|                         | Ataclè   | 2.2 ±0.2       | 7.4 ±0.4   | 5.4 ±0.7                         | 1.6 ±0.1                | 0.5 ±0.1   | 7.5 ±1.9   | 15.4 ±2.2  | 112 ±12   | 1.9 ±1.7   | 0.4 ±0.1   | 19.0 ±6        | 39.3 ±7          |
| <b>Mixed<br/>dishes</b> | Atassi   | 2.5 ±0.2       | 0.6 ±0.3   | 20.0 ±0.7                        | 2.3 ±0.1                | 0.9 ±0.1   | 7.0 ±2.3   | 11.2 ±2.9  | 75 ±19    | 0.3 ±0.1   | 0.3 ±0.1   | 10.3 ±2.5      | 28.8 ±3          |
|                         | Abla     | 2.1 ±0.5       | 6.0 ±0.7   | 7.9 ±1.2                         | 3.0 ±0.3                | 0.8 ±0.2   | 14.7 ±1.2  | 23.2 ±1.6  | 97 ±28    | 1.8 ±1.1   | 0.4 ±0.1   | 22.0 ±11       | 29.3 ±2          |
|                         | Djongoli | 2.5 ±0.4       | 4.2 ±0.9   | 11.4 ±1.5                        | 3.2 ±0.6                | 0.8 ±0.2   | 6.0 ±1.4   | 22.7 ±3.9  | 117 ±21   | 0.9 ±0.2   | 0.5 ±0.1   | 26.8 ±17       | 27.5 ±8          |

Values are the mean ± SD.

**Table S7.** Daily contributions to the RNIs of the nine cowpea-based dishes among cowpea consumers\* during the week before the FFQ survey (%).

| Area  | Group        | Dish     | Protein (%)      | Dietary fibre (%) | Ca (%)            | Fe (%)            | Mg (%)            | Zn (%)          | K (%)           | Folate (%)        | Thiamine (%)      |
|-------|--------------|----------|------------------|-------------------|-------------------|-------------------|-------------------|-----------------|-----------------|-------------------|-------------------|
| Rural | Stews        | Abobo    | 10.9 [9.9; 11.9] | 18.1 [16.4; 19.7] | 2.9 [2.6; 3.1]    | 3.0 [2.7; 3.3]    | 15.4 [13.9; 16.8] | 7.1 [6.4; 7.7]  | 7.2 [6.6; 7.9]  | 13.3 [12.1; 14.6] | 3.5 [3.2; 3.8]    |
|       |              | Vèyi     | 1.2 [0.8; 1.6]   | 2.1 [1.4; 2.8]    | 0.2 [0.2; 0.3]    | 1.3 [1.1; 1.6]    | 1.7 [1.2; 2.3]    | 0.8 [0.6; 1.1]  | 0.8 [0.6; 1.1]  | 1.8 [1.2; 2.4]    | 0.9 [0.6; 1.2]    |
|       |              | Adowè    | 0.1 [0.1; 0.2]   | 0.2 [0.1; 0.3]    | 0.03 [0.01; 0.05] | 0.03 [0.01; 0.05] | 0.2 [0.1; 0.3]    | 0.1 [0.04; 0.1] | 0.1 [0.04; 0.1] | 0.2 [0.1; 0.3]    | 0.05 [0.02; 0.08] |
|       | Dough nuts   | Ata      | 1.0 [0.8; 1.3]   | 1.1 [0.9; 1.4]    | 0.2 [0.1; 0.3]    | 0.7 [0.5; 0.9]    | 1.5 [1.1; 1.9]    | 0.7 [0.5; 0.9]  | 0.7 [0.5; 0.9]  | 1.4 [1.0; 1.8]    | 0.8 [0.6; 0.9]    |
|       |              | Ata-doco | 1.7 [1.4; 2.0]   | 2.1 [1.7; 2.5]    | 0.3 [0.3; 0.4]    | 1.0 [0.9; 1.2]    | 2.6 [2.1; 3.1]    | 1.2 [1.0; 1.5]  | 1.2 [1.0; 1.5]  | 1.6 [1.3; 1.9]    | 1.2 [0.9; 1.4]    |
|       |              | Ataclè   | 0.3 [0.1; 0.4]   | 0.3 [0.1; 0.5]    | 0.05 [0.02; 0.07] | 0.3 [0.1; 0.4]    | 0.4 [0.2; 0.6]    | 0.2 [0.1; 0.3]  | 0.2 [0.1; 0.3]  | 0.3 [0.1; 0.5]    | 0.2 [0.1; 0.3]    |
|       | Mixed dishes | Atassi   | 5.9 [5.4; 6.4]   | 9.6 [8.8; 10.5]   | 0.9 [0.8; 1.0]    | 0.9 [0.8; 1.0]    | 5.9 [5.4; 6.4]    | 3.1 [2.9; 3.4]  | 2.7 [2.5; 3.0]  | 3.3 [3.0; 3.6]    | 3.3 [3.0; 3.5]    |
|       |              | Abla     | 0.5 [0.3; 0.6]   | 1.2 [0.8; 1.6]    | 0.2 [0.1; 0.2]    | 0.5 [0.3; 0.7]    | 1.2 [0.8; 1.7]    | 0.4 [0.3; 0.6]  | 0.3 [0.2; 0.4]  | 0.7 [0.5; 0.9]    | 0.4 [0.2; 0.5]    |
|       |              | Dongola  | 2.9 [2.3; 3.4]   | 6.5 [5.3; 7.7]    | 0.4 [0.3; 0.4]    | 0.3 [0.2; 0.4]    | 5.8 [4.7; 6.9]    | 2.5 [2.0; 2.9]  | 2.0 [1.7; 2.4]  | 4.2 [3.4; 4.9]    | 1.1 [0.9; 1.3]    |
| Urban | Stews        | Abobo    | 9.9 [9.0; 10.9]  | 16.5 [14.9; 18.1] | 2.6 [2.4; 2.9]    | 2.8 [2.5; 3.0]    | 14.0 [12.7; 15.4] | 6.5 [5.8; 7.1]  | 6.6 [6.0; 7.2]  | 12.2 [11.0; 13.2] | 3.2 [2.9; 3.5]    |
|       |              | Vèyi     | 2.7 [2.1; 3.3]   | 4.7 [3.7; 5.7]    | 0.5 [0.4; 0.7]    | 0.7 [0.5; 0.8]    | 3.8 [3.0; 4.7]    | 1.8 [1.4; 2.2]  | 1.8 [1.4; 2.2]  | 4.0 [3.1; 4.8]    | 1.5 [1.2; 1.9]    |
|       |              | Adowè    | 0.6 [0.5; 0.8]   | 0.9 [0.7; 1.1]    | 0.5 [0.4; 0.7]    | 0.1 [0.1; 0.2]    | 0.8 [0.6; 1.1]    | 0.4 [0.3; 0.5]  | 0.4 [0.3; 0.5]  | 0.9 [0.7; 1.1]    | 0.1 [0.1; 0.2]    |
|       | Dough nuts   | Ata      | 5.1 [1.9; 3.9]   | 5.7 [4.8; 6.5]    | 3.5 [3.0; 4.1]    | 3.6 [3.1; 4.1]    | 7.6 [6.5; 8.7]    | 3.6 [3.1; 4.1]  | 3.5 [3.0; 4.0]  | 7.0 [6.0; 8.0]    | 4.2 [3.6; 4.8]    |
|       |              | Ata doco | 2.9 [1.9; 3.9]   | 3.6 [2.4; 4.8]    | 0.6 [0.4; 0.8]    | 1.7 [1.1; 2.3]    | 4.5 [3.0; 6.0]    | 2.2 [1.4; 2.9]  | 2.1 [1.4; 2.9]  | 2.8 [1.8; 3.7]    | 2.1 [1.4; 2.7]    |
|       |              | Ataclè   | 0.9 [0.3; 1.4]   | 1.1 [0.4; 1.8]    | 0.2 [0.1; 0.2]    | 0.9 [0.3; 1.5]    | 1.3 [0.5; 2.2]    | 0.6 [0.2; 1.0]  | 0.7 [0.2; 1.1]  | 1.0 [0.4; 1.6]    | 0.7 [0.3; 1.7]    |
|       | Mixed dishes | Atassi   | 5.0 [4.5; 5.4]   | 8.1 [7.4; 8.9]    | 0.7 [0.7; 0.8]    | 0.8 [0.7; 0.8]    | 5.0 [4.6; 5.5]    | 2.7 [2.4; 2.9]  | 2.3 [2.1; 2.5]  | 2.7 [2.5; 3.0]    | 2.7 [2.4; 2.9]    |
|       |              | Abla     | 0.3 [0.1; 0.8]   | 0.7 [0.2; 1.2]    | 0.4 [0.1; 0.7]    | 0.3 [0.1; 0.5]    | 0.7 [0.2; 1.2]    | 0.3 [0.1; 0.4]  | 0.2 [0.1; 0.3]  | 0.4 [0.1; 0.7]    | 0.05 [0.01; 0.1]  |
|       |              | Djongoli | 0.9 [0.7; 1.2]   | 2.1 [1.6; 2.7]    | 0.1 [0.1; 0.2]    | 0.4 [0.3; 0.6]    | 1.9 [1.4; 2.5]    | 0.8 [0.6; 1.0]  | 0.7 [0.5; 0.7]  | 1.4 [1.0; 1.8]    | 0.5 [0.3; 0.6]    |

Values are the mean [95% confidence intervals]. \*All respondents with the exclusion of non-consumers of cowpea seeds.

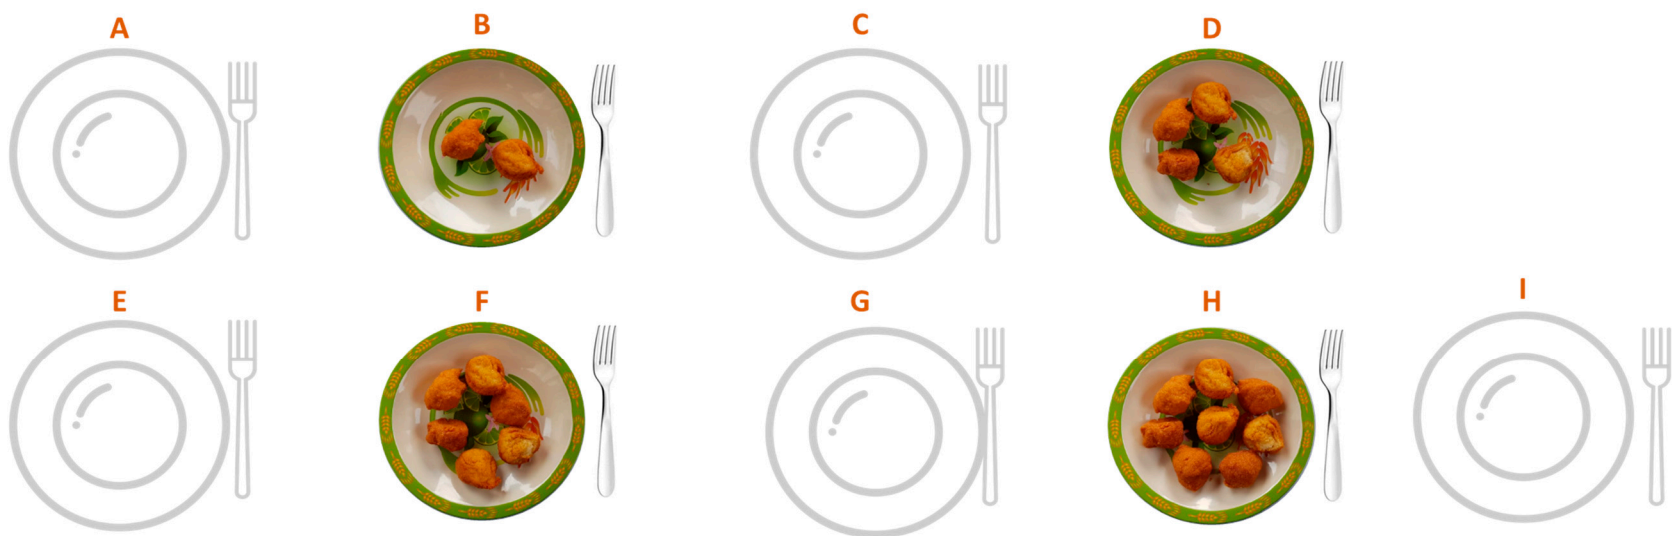

**Figure S1.** Example of portion sizes for the cowpea-based doughnuts Ata presented in the food atlas.



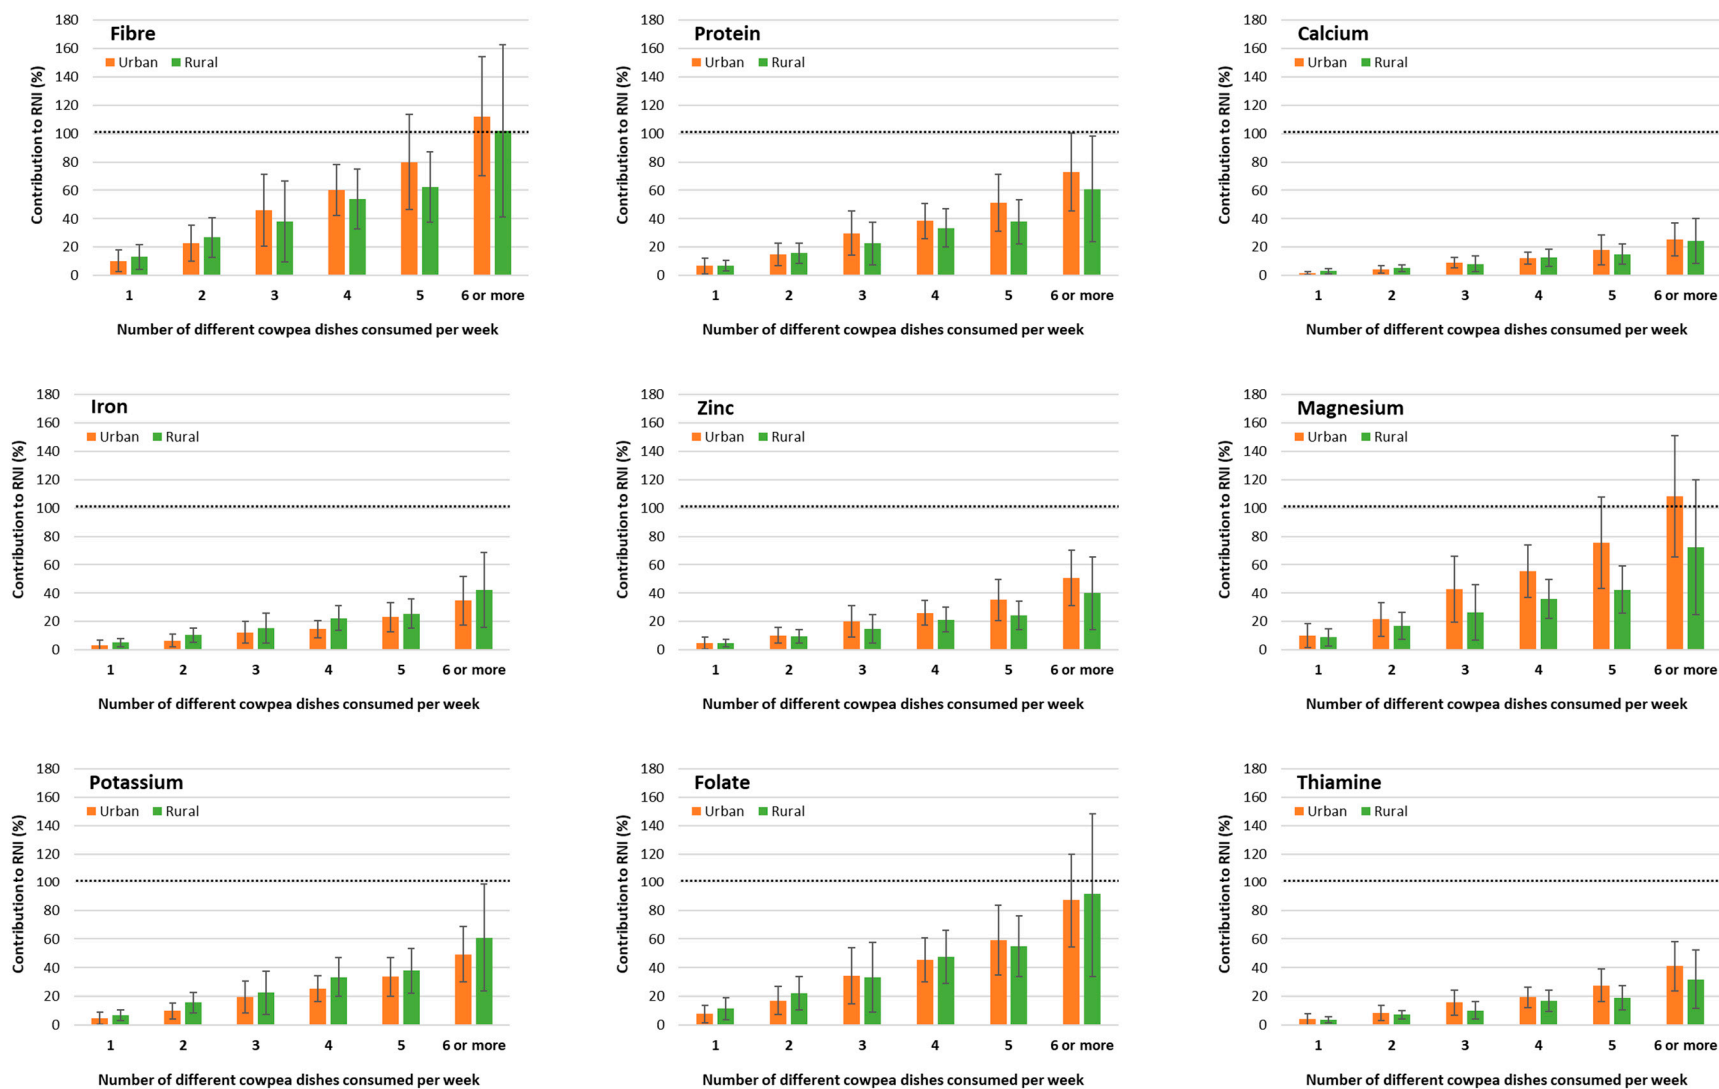

**Figure S2.** Estimation of the contribution of cowpea-based dishes to RNI, depending on the number of different dishes consumed in the week preceding the FFQ survey

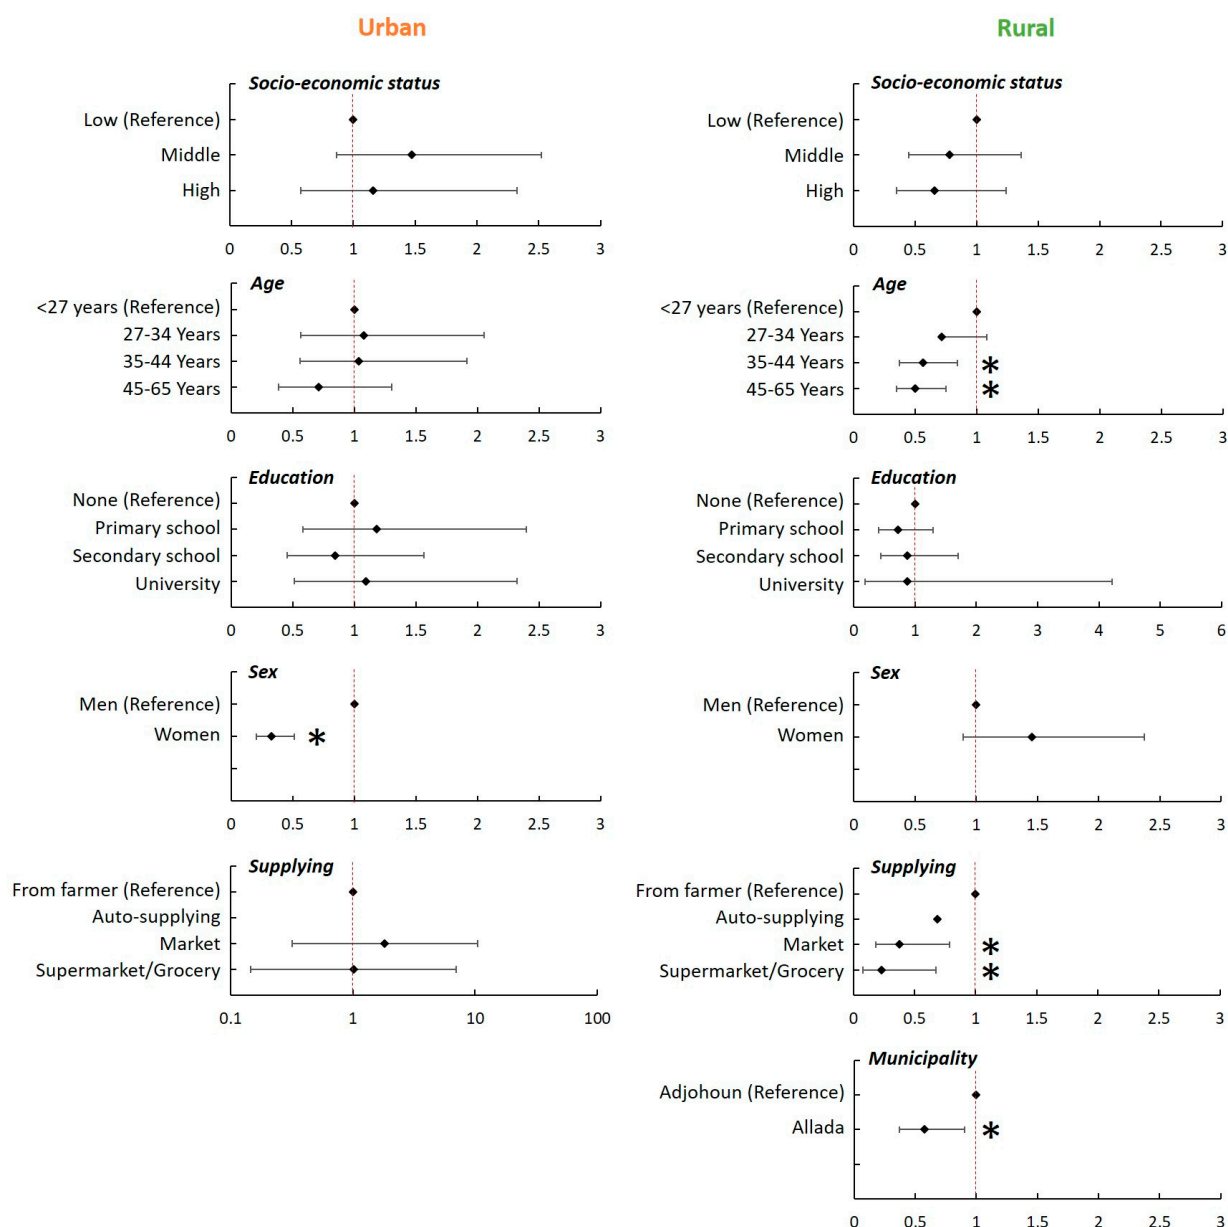

**Figure S3.** Influence of socio-economic and demographic factors on the chance to meet the Eat-lancet Commission recommendation for daily legume intake (set at 50 g): odd ratios. For consumers with daily cowpea intake lower than the 50 g threshold, we attributed the modality "0", while for consumers who consumed more than 50 g, we assigned the modality "1". Dashed vertical red lines represent the reference for each factor. \*: p value < 0.05.
